1 **Prevalence and risk factors of postpartum depression**  
2 **among women living in urban slums of Dhaka, Bangladesh**

3

4 Rashidul Azad\*<sup>1,2</sup>, Rukshan Fahmi<sup>1</sup>, Sadichhya Shrestha<sup>1,3</sup>, Hemraj Joshi<sup>1,4</sup>, Mehedi Hasan<sup>1</sup>,  
5 Abdullah Nurus Salam Khan<sup>2,5</sup>, Mohiuddin Ahsanul Kabir Chowdhury<sup>2,5</sup>, Shams El Arifeen<sup>2</sup>  
6 and Sk Masum Billah<sup>2</sup>

7

8 <sup>1</sup>James P Grant School of Public Health, BRAC University, Dhaka, Bangladesh

9 <sup>2</sup>International Centre for Diarrhoeal Disease Research, Bangladesh (icddr,b), Dhaka,  
10 Bangladesh

11 <sup>3</sup>Nepal Red Cross Society, Kathmandu, Nepal

12 <sup>4</sup>Lifeline Nepal, Kathmandu, Nepal

13 <sup>5</sup>Arnold School of Public Health, University of South Carolina, Columbia, South Carolina,  
14 USA

15

16 \*Corresponding author

17 Email: [rashidul.azad@icddr.org](mailto:rashidul.azad@icddr.org), [rashedazad123@gmail.com](mailto:rashedazad123@gmail.com)

18

19

20

21

22

23

24

## 25 **Abstract**

26 Postpartum depression (PPD) is a serious public health concern and known to have  
27 the adverse effects on mother's perinatal wellbeing; and child's physical and cognitive  
28 development. There were limited literatures on PPD in Bangladesh, especially in urban slum  
29 context. The aim of this study was to assess the burden and risk factors of PPD among the  
30 urban slum women. A cross-sectional study was conducted between November-December  
31 2017 in three urban slums on 376 women within first 12 months of postpartum. A validated  
32 Bangla version of Edinburgh Postnatal Depression Scale was used to measure the depression  
33 status. Respondent's socio-economic characteristics and other risk factors were collected with  
34 structured validated questionnaire by trained interviewers. Unadjusted Prevalence Ratio (PR)  
35 and Adjusted Prevalence Ratio (APR) were estimated with Generalized Linear Model (GLM)  
36 and Generalized Estimating Equation (GEE) respectively to identify the risk factors of PPD.  
37 The prevalence of PPD was 39.4% within first 12 months following the child birth. Job  
38 involvement after child delivery (APR=1.9, 95% CI= 1.1, 3.3), job loss due to pregnancy  
39 (APR=1.5, 95% CI= 1.0, 2.1), perinatal and postnatal death (APR=1.4, 95% CI= 0.97, 2.0),  
40 unintended pregnancy (APR=1.8, 95% CI= 1.3, 2.5), management of delivery cost by  
41 borrowing, selling or mortgaging assets (APR=1.3, 95% CI= 0.94, 1.9), depressive symptom  
42 during pregnancy (APR=2.5, 95% CI= 1.7, 3.8) and intimate partner violence (APR=2.0, 95%  
43 CI= 1.2, 3.3), were identified as risk factors. PPD was not associated with poverty, mother in  
44 law and any child related factors. The burden of postpartum depression is high in the urban  
45 slum of Bangladesh. Maternal mental health services should be integrated with existing  
46 maternal health services. Research is required for the innovation of effective, low cost and  
47 culturally appropriate PPD case management and preventive intervention in urban slum of  
48 Bangladesh.

49

## 50 **Introduction**

51           Postpartum depression (PPD) is a common, non-psychotic mood or mental disorder  
52 which typically manifests in mothers within one year of delivery (first year postpartum) [1, 2].  
53 Globally, the prevalence of PPD among mothers ranges from 0.5% to 60.8% [3]. In  
54 comparison to women of developed countries, women of developing countries showed higher  
55 rates of PPD [4]. A systematic review of 28 developed countries reported that the prevalence  
56 PPD symptom (PPDS) was 6-13% among women in high income nations [5]. An independent  
57 systematic review on low and middle income countries (LMIC) found the prevalence of  
58 postpartum common mental disorder was approximately 20% [6]. Asian countries reported  
59 between 3.5-63.3% prevalence rates of depression in postpartum women [7]. In India the  
60 prevalence of depression varied from 11% to 16% within fourteen weeks of delivery [8].  
61 Several studies conducted in rural Bangladesh found the prevalence of PPD ranged from 18%  
62 to 35% among rural women [1, 2, 9].

63

64           There are various factors causing PPD that affects women of all ages, education  
65 levels, races, and ethnicities [10]. Globally, preterm or low birth-weight infants,  
66 unemployment, poor social or emotional support, housing problems, first-born child, sleep  
67 disturbances, low self-esteem, antenatal depression or anxiety, history of domestic abuse,  
68 major adverse life events in preceding one year, perfectionism and level of daily hassles are  
69 strong predictors of PPD among women [11, 12]. The risk factors identified in the rural areas  
70 of Bangladesh were low economic status, nutritional status, physical violence, domestic  
71 quarrels with husband and in laws, stress, past mental and depressive symptoms during

72 pregnancy, perinatal death, poor relationship between husband and in laws, morbidity during  
73 pregnancy, and current health condition [1, 2, 13, 14].

74

75 PPD has negative impacts on children's physical health. Existing literature of LMICs  
76 suggests that PPD leads to poor infant feeding practices, consequently leading to malnutrition  
77 and reduced physical growth [15, 16]. The effects of PDD are not limited to physical  
78 symptoms but can also impact the mental health of the affected mothers' child. PDD leads to  
79 the lower levels of interaction and bonding between the mother and child, which leads to  
80 inadequate social, emotional and cognitive development of the child [17, 18]. Research also  
81 suggested that repeated level of depression leads to high level of chronic stress at the later age  
82 [17]. Further, PPD has a harmful impact on the family and social life [19].

83

84 In Bangladesh, mental health is a neglected topic and there is very little research on  
85 postpartum depression, especially on the prevalence and the risk factors of PPD. Only one  
86 qualitative study of PPD in urban slum populations was found and it focused on the cultural  
87 attitude towards PPD. Of the 36 women interviewed, 17 women were suffering from PPD  
88 [20]. In this study women mentioned that financial crises, adverse life events, intimate partner  
89 violence, health problems, and lack of practical social support were the reported causes of  
90 postpartum emotional distress and sadness [20].

91

92 The population of urban Dhaka was estimated to be approximately 17 million in  
93 2015 [21] and nearly one third of the population Dhaka city inhabit slums [22]. Within the  
94 next 14 years the urban population will increase by 50% due to rapid urbanization [23]. The  
95 status of PPD in women in urban slums has received less attention than the rural populations

96 of Bangladesh, furthermore the prevalence and associated risk factors for PPD in slum areas  
97 were unknown. The objective of this proposed study was to assess the burden and risk factors  
98 of PPD among women living in urban slums of Dhaka, Bangladesh.

99

## 100 **Materials and methods**

### 101 **Study design and setting**

102 A cross-sectional study was conducted in three selected large slums from different  
103 geographical representative areas in Dhaka city. These slums included the Korail slum in  
104 Gulshan, the Sattala slum in Mohakhali, and the Mohammadpur slum in Mohammadpur.  
105 Three different slums were selected to address the lack of variation that could arise from  
106 selecting only one slum population.

107

### 108 **Study participants, sample size and sampling strategy**

109 The study population was postpartum mothers with a child under the age of one year  
110 living in urban slums. Considering 22% PPD prevalence in rural area of Bangladesh [1]; and  
111 with 4.2% margin of error and 95% level of significance, the calculated sample size was 374.  
112 We divided each slum into different sectors and visited all households of each sector and  
113 searched the post-partum mothers according to our inclusion criteria. If mothers were found,  
114 present and agreed to participate our study then we interviewed those mothers. We visited and  
115 searched for study participants in all household of Sattala and Korail slum; and partially some  
116 sectors of Mohammadpur slum; and ended up with 376 interviews of postpartum mothers.

117

## 118 **Data collection**

119 The data were collected between November and December 2017. The data collection team  
120 included four research team members and four research assistants with backgrounds in social  
121 sciences. Experienced research psychologist, gender experts and maternal and child health  
122 (MCH) experts intensively trained the data collection team. Each day after data collection a  
123 team meeting was held and filled questionnaires were cross-checked. Possible erratic  
124 responses were identified, discussed and corrected.

125

## 126 **Outcome measure**

127 The Edinburgh Postnatal Depression Scale (EPDS) was used to detect depressive  
128 symptoms during the postpartum period [24]. EPDS is a 10-item questionnaire assessing the  
129 interviewee's depressive feelings from the seven days before the interview. The response of  
130 the questions is scored from 0-3, with higher scores indicating higher levels of depressive  
131 symptoms. The total EPDS score of a respondent can range from 0 to 30. Cox et al. (1987)  
132 proposed a cutoff level ten ( $\geq 10$ ) to reduce the detection failure of PPD. In Bangladesh, a  
133 validation study showed 89% sensitivity, 87% specificity, 40% positive predictive value and  
134 99% negative predictive value of using 10 as the cutoff score [25]. Another follow-up study of  
135 EPDS usage in Bangladesh demonstrated good reliability with Cronbach's alpha 0.70 and  
136 0.75 [2]. In this study greater than the 10 cutoff value of EPDS scale will be used to screen  
137 PPD.

138

## 139 **Risk factors**

140 The validated tools of Bangladesh Demographic and Health Survey  
141 (BDHS), Bangladesh Urban Health Survey (BUHS) and WHO Domestic Violence Against  
142 Women were adapted to prepare our tools of the study. The data were collected in the  
143 following manner for the analysis of risk factors.

144

### 145 **Socio-economic characteristics**

146 Socio-demographic information (age, age of marriage, educational status, income  
147 generating activities before pregnancy and after pregnancy, etc) and household characteristics  
148 (basic household construction, ownership, availability of toilet and water facilities, household  
149 belongings, etc) were collected through face-to-face interviews using a standard validated  
150 questionnaire. The wealth score of households were computed through principal component  
151 analysis using household characteristics of respondents.

152

### 153 **Pregnancy related factors**

154 Obstetric, reproductive, and child characteristics such as the number of children,  
155 history of miscarriage and child death, pregnancy intention, age and sex of last child, reported  
156 gestational age and child birth weight, neo-natal complications, ANC and PNC information,  
157 mode of delivery (caesarean or normal), cost of delivery, and delivery cost management were  
158 collected through standard questions. Gestational ages less than 37 weeks were categorized as  
159 pre-term births and birth weights less than 2.5 kg was considered to be low birth weights.

160

161 Each respondent was asked whether she had experienced at least one depressive  
162 symptom of EPDS scale during pregnancy period. If their response was positive then we

163 categorized them as depressive symptom started to develop from pregnancy period. We also  
164 asked respondents whether family, work or any other form mental stress took place during  
165 pregnancy period. This was characterized as perceived antenatal stress.

166

## 167 **Family support and intimate partner violence**

168 Women's experience of intimate partner violence (IPV) was collected using the  
169 domestic violence module of WHO's multicounty study which included Bangladesh [26]. The  
170 study divided intimate partner violence into three categories; psychological, physical and  
171 sexual. Each respondent was asked if they any type of IPV during their last pregnancy and 12  
172 months before the conception.

173

174 Family support was measured by assistance level of mother in law and husband in  
175 taking care of children and helping in household chores. This was assessed through likert  
176 scale (always, often, sometime, rarely and never). Relationship with husband was assessed by  
177 asking the sharing status of personal feelings to husband with similar likert scale.

178

## 179 **Data analysis**

180 We calculated the descriptive statistics of respondents' background characteristics,  
181 PPD status, and other relevant variables. Then we conducted a series of cross-tabulation  
182 including the chi-square test to assess the bivariate relationship of PPD and relevant risk  
183 factors (p-value of chi square test was not reported in the data table). Simultaneously,  
184 Prevalence Ratio (PR) among the different category of risk factors was calculated using  
185 Generalized Linear Model (GLM) with poisson family and log link.



186

187 Risk factors identified in the bivariate analysis were analyzed in the multivariate  
188 model. Risk factors were added to the multivariate model according to the strength of  
189 association in bivariate analysis. Moreover, multi-collinearly and overlapping nature among  
190 the variables were considered for selection of risk factors in the multivariate model. Adjusted  
191 analysis (clustering and confounder adjustment) was conducted using the Generalized  
192 Estimating Equation (GEE). Statistical software STATA version 13 was used in data analysis.

193

## 194 **Ethical consideration**

195 Prior to the study, ethical approval was taken from the Ethical Review Committee,  
196 JPGSPH. Participants were recruited after reading the full statement of consent and signing  
197 the Bangla written consent. We referred the depressed mothers or who had the thought of  
198 harming herself to the Government's National Mental Institute of Bangladesh.

199

## 200 **Results**

201 Among the post-partum mothers 25% were adolescents and 32% were illiterate or  
202 with just enough skills to sign their names. On the other hand, 15% of mothers attained a  
203 secondary level of education and only 1.6% of mothers received a higher education.  
204 Approximately half, (48.7%) were first time mothers and 20% had three or more children. The  
205 mean number of household members was 4.5 and most of the families (84%) resided in one  
206 room. Only 7.7% of mothers were working after delivering their child, but before their most  
207 recent pregnancy around 50% of mothers engaged in income generating activities. Among the  
208 respondents we interviewed, 22.6% experienced the death of one of their children, or

209 miscarriage, or stillbirth and 68% of respondents planned their most recent pregnancy. About  
 210 69% of mothers faced intimate partner violence before their last pregnancy, and 48% faced it  
 211 during the pregnancy period as well (Table 1).

212 **Table 1: Respondent's characteristics**

| <b>Indicators</b>                                               | <b>n(%), Mean±SD<br/>(N=376)</b> |
|-----------------------------------------------------------------|----------------------------------|
| Respondent's age                                                |                                  |
| 13-19                                                           | 85 (25.2)                        |
| 20-29                                                           | 208 (61.7)                       |
| 30-49                                                           | 44 (13.1)                        |
| Education of respondent                                         |                                  |
| No education/signed only                                        | 119 (31.7)                       |
| Primary                                                         | 193 (51.3)                       |
| Secondary or higher                                             | 64 (17.0)                        |
| No of children                                                  |                                  |
| 1                                                               | 183 (48.7)                       |
| 2                                                               | 118 (31.4)                       |
| 3+                                                              | 75 (20.0)                        |
| Mean number of household members                                | 4.5± 0.09                        |
| No of living room                                               |                                  |
| 1                                                               | 315 (83.8)                       |
| 2+                                                              | 61 (16.2)                        |
| Currently working                                               | 29 (7.7)                         |
| Job involvement before pregnancy                                | 187 (49.7)                       |
| Job loss due to pregnancy                                       | 164 (47.3)                       |
| Perinatal death                                                 | 85 (22.6)                        |
| Intended pregnancy                                              | 254 (67.6)                       |
| Gestational age                                                 |                                  |
| Pre-term birth                                                  | 58 (15.8)                        |
| Term birth                                                      | 309 (84.2)                       |
| Birth weight of last child                                      |                                  |
| Low birth weight                                                | 161 (47.9)                       |
| Normal weight                                                   | 175 (52.1)                       |
| Neo-natal complications                                         | 78 (21.7)                        |
| Cost of child delivery managed by borrowing/sold asset/mortgage | 96 (25.5)                        |
| Intimate partner violence before last pregnancy*                | 259 (69.1)                       |

|                                                                      |            |
|----------------------------------------------------------------------|------------|
| Intimate partner violence during last pregnancy*                     | 179 (47.7) |
| Postpartum depression status                                         | 148 (39.4) |
| At least one depressive symptom reported to develop during pregnancy | 189 (50.3) |
| Perceived antenatal stress                                           | 143 (38.0) |

213 \*At least one type of psychological, physical or sexual violence

214

## 215 **Prevalence of postpartum depression**

216 After administration of EPDS scale, 148 (39.4%) mothers out of 376 mothers were  
 217 found having postpartum depression. About 50% mothers reported at least one symptom of  
 218 EPDS scale developed during pregnancy period and 38% reported any family, working and  
 219 other form of mental stress during the pregnancy period (Table 1).

220

## 221 **Potential risk factors of postpartum depression**

222 The potential risk factors of postpartum depression were organized in following  
 223 categories: socio-economic factors; pregnancy related factors and family support and intimate  
 224 partner violence (Table2).

225 **Table 2: Bivariate and multivariable association of postpartum depression with socio-**  
 226 **economic factors, pregnancy related factors, and family support and intimate partner**  
 227 **violence**

| Indicators                    | n  | Depressed (%) | Prevalence Ratio (PR) (95% CI) | p-value | Adjusted Prevalence Ratio (APR) <sup>‡</sup> (95% CI) | p-value |
|-------------------------------|----|---------------|--------------------------------|---------|-------------------------------------------------------|---------|
| <b>Socio-economic factors</b> |    |               |                                |         |                                                       |         |
| Respondent's age              |    |               |                                |         |                                                       |         |
| 13-19                         | 85 | 32.9          | 1                              |         |                                                       |         |

|                                      |     |      |                |        |                 |       |
|--------------------------------------|-----|------|----------------|--------|-----------------|-------|
| 20-29                                | 208 | 42.3 | 1.3 (0.8,2.0)  | 0.249  |                 |       |
| 30-49                                | 44  | 54.6 | 1.7 (0.9,2.6)  | 0.070  |                 |       |
| <b>Wealth quintile</b>               |     |      |                |        |                 |       |
| Poorest                              | 76  | 40.8 | 1.2 (0.7, 2.1) | 0.453  |                 |       |
| Poor                                 | 75  | 49.3 | 1.5 (0.9, 2.5) | 0.130  |                 |       |
| Medium                               | 75  | 34.7 | 1.0 (0.6, 1.8) | 0.889  |                 |       |
| Rich                                 | 75  | 38.7 | 1.2 (0.7, 2.0) | 0.587  |                 |       |
| Richest                              | 75  | 33.3 | 1              |        |                 |       |
| <b>Education of respondent</b>       |     |      |                |        |                 |       |
| No education/signed only             | 119 | 48.7 | 1.8 (1.1,3.2)  | 0.028  | 1.2 (0.7,2.1 )  | 0.559 |
| Primary                              | 193 | 37.8 | 1.4 (0.8,2.4)  | 0.189  | 0.9 (0.5,1.6 )  | 0.687 |
| Secondary or higher                  | 64  | 26.6 | 1              |        | 1               |       |
| <b>Current profession</b>            |     |      |                |        |                 |       |
| Working                              | 29  | 62.1 | 1.7 (1.0,2.7)  | 0.045  | 1.9 (1.1,3.3 )  | 0.020 |
| Not working                          | 347 | 37.5 | 1              |        | 1               |       |
| <b>Job loss due to pregnancy</b>     |     |      |                |        |                 |       |
| Yes                                  | 164 | 45.7 | 1.5 (1.1,2.2)  | 0.018  | 1.5 (1.0,2.1 )  | 0.040 |
| No                                   | 183 | 30.1 | 1              |        | 1               |       |
| <b>No of children</b>                |     |      |                |        |                 |       |
| 1                                    | 183 | 33.9 | 1              |        | 1               |       |
| 2                                    | 118 | 39.8 | 1.2 (0.8,1.7)  | 0.403  | 1.0 (0.7,1.5 )  | 0.982 |
| 3+                                   | 75  | 52.0 | 1.5 (1.0,2.3)  | 0.036  | 0.96 (0.6,1.5 ) | 0.843 |
| <b>Pregnancy related factors</b>     |     |      |                |        |                 |       |
| <b>Perinatal and postnatal death</b> |     |      |                |        |                 |       |
| Yes                                  | 85  | 50.6 | 1.4 (.98,2.0)  | 0.062  | 1.4 (0.97,2.0 ) | 0.073 |
| No                                   | 291 | 36.1 | 1              |        | 1               |       |
| <b>Pregnancy type</b>                |     |      |                |        |                 |       |
| Intended pregnancy                   | 254 | 29.9 | 1              |        | 1               |       |
| Unintended pregnancy                 | 122 | 59.0 | 2.0 (1.4,2.7)  | <0.001 | 1.8 (1.3,2.5 )  | 0.001 |
| <b>Gestational age</b>               |     |      |                |        |                 |       |
| Pre-term birth                       | 58  | 48.3 | 1.3 (0.8,1.9)  | 0.265  |                 |       |
| Term birth                           | 309 | 38.2 | 1              |        |                 |       |
| <b>Birth weight of last child</b>    |     |      |                |        |                 |       |
| Low birth weight                     | 161 | 42.2 | 1.1 (0.8,1.5)  | 0.627  |                 |       |

|                                                                      |     |      |                |        |                 |        |
|----------------------------------------------------------------------|-----|------|----------------|--------|-----------------|--------|
| Normal weight                                                        | 175 | 38.9 | 1              |        |                 |        |
| Neo-natal complications                                              |     |      |                |        |                 |        |
| Yes                                                                  | 78  | 46.2 | 1.2 (0.9,1.8)  | 0.254  |                 |        |
| No                                                                   | 281 | 37.0 | 1              |        |                 |        |
| Child delivery cost management by borrowing/sold asset/mortgage      |     |      |                |        |                 |        |
| Yes                                                                  | 96  | 55.2 | 1.6 (1.2,2.3)  | 0.005  | 1.3 (0.94,1.9 ) | 0.108  |
| No                                                                   | 280 | 33.9 | 1              |        | 1               |        |
| Perceived antenatal stress                                           |     |      |                |        |                 |        |
| Yes                                                                  | 143 | 65.7 | 2.8 (2.0,4.0)  | <0.001 |                 |        |
| No                                                                   | 233 | 23.2 | 1              |        |                 |        |
| At least one depressive symptom reported to develop during pregnancy |     |      |                |        |                 |        |
| Yes                                                                  | 189 | 61.4 | 3.6 (2.4,5.3)  | <0.001 | 2.5 (1.7,3.8 )  | <0.001 |
| No                                                                   | 187 | 17.1 | 1              |        | 1               |        |
| <b>Family support and intimate partner violence</b>                  |     |      |                |        |                 |        |
| Mother-in-law take care of child and help in household work          |     |      |                |        |                 |        |
| Always/Often                                                         | 64  | 40.6 | 1              |        |                 |        |
| Sometimes/Rarely/ Never                                              | 17  | 64.7 | 1.6 (0.8,3.2)  | 0.196  |                 |        |
| Husband take care of child and help in household work                |     |      |                |        |                 |        |
| Always/Often                                                         | 230 | 36.5 | 1              |        |                 |        |
| Sometimes /Rarely/Never                                              | 108 | 50.0 | 1.4 (0.97,1.9) | 0.072  |                 |        |
| Share personal feelings with husband                                 |     |      |                |        |                 |        |
| Always/Often                                                         | 271 | 33.2 | 1              |        |                 |        |
| Sometimes/ Rarely/ Never                                             | 67  | 71.6 | 2.2 (1.5,3.1)  | <0.001 |                 |        |
| Intimate partner violence before last pregnancy                      |     |      |                |        |                 |        |
| Yes                                                                  | 259 | 49.4 | 3.0 (1.9,4.9)  | <0.001 |                 |        |
| No                                                                   | 116 | 16.4 | 1              |        |                 |        |
| Intimate partner violence during last pregnancy                      |     |      |                |        |                 |        |

|                                                             |     |      |               |        |                |       |
|-------------------------------------------------------------|-----|------|---------------|--------|----------------|-------|
| Yes                                                         | 179 | 55.3 | 2.3 (1.6,3.2) | <0.001 |                |       |
| No                                                          | 196 | 24.5 | 1             |        |                |       |
| Intimate partner violence before or during pregnancy period |     |      |               |        |                |       |
| Yes                                                         | 260 | 49.6 | 3.0 (1.9,4.9) | <0.001 | 2.0 (1.2,3.3 ) | 0.009 |
| No                                                          | 116 | 16.4 | 1             |        | 1              |       |

228 <sup>‡</sup>Estimates adjusted for clustering at slum level and wealth score

229

## 230 **Bivariate risk factor analysis**

### 231 **Socio-economic factors**

232 Postpartum depression among the women of urban slum was not associated with  
 233 respondent age and wealth quintile( $p>0.05$ ).The prevalence of postpartum depression was  
 234 higher in the uneducated group of women (49%) compare to the women (26%) who  
 235 completed the secondary of higher level of education( $PR=1.8$ ,  $p=0.028$ , 95% CI= 1.1,  
 236 3.2).The prevalence of depression was more common in currently employed mothers  
 237 comparing unemployed mothers ( $PR=1.7$ ,  $p=0.045$ , 95% CI= 1.0, 2.7).The likelihood of  
 238 depression among the mothers who worked before pregnancy but left their work due to  
 239 pregnancy is also higher than the likelihood of depression in other groups of mothers ( $PR=1.5$ ,  
 240  $p=0.02$ , 95% CI= 1.1, 2.2).

241

### 242 **Pregnancy related factors**

243 Respondents who experienced perinatal or postnatal death (child death, miscarriage  
 244 or still birth) had a higher prevalence of postpartum depression ( $PR=1.4$ ,  $p=0.06$ , 95% CI=  
 245 .98, 2.0).Unplanned pregnancy was a major factor of postpartum depression among the study  
 246 participants( $PR=2.0$ ,  $p<0.001$ , 95% CI= 1.4, 2.7).Postpartum depression were not correlated

247 with factors related to the child such as preterm birth ( $p=0.265$ ), low birth weight child  
248 ( $p=0.627$ ) and neonatal complication ( $p=0.254$ ). However, the prevalence of depression was  
249 60% higher for mothers, whose family arranged the delivery cost by borrowing, selling or  
250 through mortgage assets ( $p=0.005$ ). Perceived antenatal stress (family, working or any other  
251 mental stress) during pregnancy was another strong predictor of PPD (PR=2.8,  $p<0.001$ , 95%  
252 CI= 2.0, 4.0). PPD was most common among the mothers who had at least one EPDS  
253 depressive symptom developed during pregnancy period (PR=3.6,  $p<0.001$ , 95% CI= 2.4,  
254 5.3).

255

## 256 **Family support and intimate partner violence**

257 Maternal depression was not associated with mother-in-law's support in slum area  
258 ( $p=0.196$ ), but depression was fairly associated with the practical support of husband  
259 ( $p=0.072$ ). The prevalence of depression was more than two times higher for women who  
260 sometimes/never/rarely shared their personal feelings with their husband in comparison to the  
261 women who always or often shared their personal feelings with their husband  
262 (PR=2.2,  $p<0.001$ , 95% CI= 2.0, 4.5). Similarly, PPD was most common for women who faced  
263 the intimate partner violence both before their recent pregnancy and during the pregnancy  
264 period (IPV before pregnancy: PR=3.0,  $p<0.001$ , 95% CI= 1.9, 4.9) (IPV during pregnancy:  
265 PR=2.3,  $p<0.001$ , 95% CI= 1.6, 3.2).

266

## 267 **Multivariable risk factor analysis**

268 After inclusion of all relevant factors in multivariate regression model, the risk  
269 estimates slightly reduced but remained significant for current job involvement, job loss due  
270 to pregnancy, unintended pregnancy, development of depressive symptoms during pregnancy

271 period, and intimate partner violence. In the full model, the adjusted prevalence of depression  
272 was almost 2 times higher (APR=1.9, p=0.02, 95% CI=1.1, 3.3) for those who had some form  
273 of employment, 50% higher for those who quit their job due to pregnancy (APR=1.5, p=0.04,  
274 95% CI=1.0, 2.1). For the postpartum mothers who conceived unintentionally the adjusted  
275 prevalence of depression was 80% higher (APR=1.8, p=0.001, 95% CI= 1.3, 2.5). The  
276 adjusted prevalence of postpartum depression was about 2.5 times higher among the women  
277 who reported to develop the depressive symptom during the pregnancy period (APR=2.5,  
278 p<0.001, 95% CI= 1.7, 3.8). The adjusted prevalence of depression was 2 times higher  
279 (APR=2.0, p=0.009, 95% CI= 1.2, 3.3) among the postpartum mothers who faced intimate  
280 partner violence before child birth.

281

282 However, other risk factors, i.e., delivery cost management by borrowing/sold  
283 asset/mortgage (APR=1.3, 95% CI=.94, 1.9) and perinatal and postnatal child death  
284 (APR=1.4, 95% CI=.97, 2.0) were closely significant at 5% level of significance, which may  
285 be significant for larger samples of postpartum mothers in urban slum.

286

## 287 **Discussion**

288 This study explored the burden of postpartum depression and the associated factors in  
289 slum areas. Our study results show that about 40 women out of 100 women were suffering  
290 from PPD and the associated risk factors were current job involvement, job loss due to  
291 pregnancy, perinatal and postnatal death, unintended pregnancy, cost of delivery managed  
292 from borrowing/selling asset/mortgage, depressive symptom during pregnancy period,  
293 perceived antenatal stress, poor marital relationship with husband, and intimate partner  
294 violence.



295

296           The burden of PPD in women who inhabited slums was higher in comparison that of  
297 postpartum mothers living in rural areas [1, 2, 9]. Existing mental disorder data of urban slum  
298 women also suggested the higher level of mental disease burden in slum area. In one recent  
299 study at an urban slum, Khan et al. found that 46% mothers with children under the age of  
300 five suffered from common mental disorders [27].

301

302           Half of our respondents had been involved in income generating activities before the  
303 pregnancy, while only six percent of survey respondents were involved in income generating  
304 activities during the postpartum period. Depression was more common for the women who  
305 worked but quit job due to pregnancy. There was the scarcity of data about the postpartum  
306 mental health and unemployment in low income countries. In a study of Canadian postpartum  
307 mothers, depression was less common in women who were in maternity leave [28]. Similarly,  
308 an Australian study found the evidence that paid maternal leave was beneficial for post-  
309 partum health and wellbeing [29]. In Bangladesh Labour Law there is a provision for paid  
310 maternity leave [30]. A strict implementation of clause 45 to 50 of the Bangladesh Labour  
311 Law might improve the postpartum mental health of slum working women.

312

313           Postpartum depression was also high among mothers who were working after child  
314 delivery. This was because with the professional working stress, taking care of new child  
315 added additional stress to women. These multiple roles led to role overload that could have  
316 negative effects on psychological well-being of postpartum mother [28, 31]. Some  
317 government oversight of maternity schemes for postpartum women, especially for the women  
318 working in slum areas, might improve the postpartum mental wellbeing of slum women.

319

320 PPD was not associated with household economic status within slum areas. This  
321 result contradicts the PPD findings within the rural context of Bangladesh [2, 14]. The  
322 possible explanation could be the people of slum area were concerned with immediate  
323 economic survival [32] rather than long term economic stability (measured by the wealth  
324 index).

325

326 However, debt and sudden financial hardship of family may affect the postpartum  
327 mental health of women [33, 34]. Depression was higher for women, whose child delivery  
328 cost was managed by borrowing, selling assets or through mortgages. The findings of recent  
329 national maternal mortality survey revealed that private sector delivery has increased several  
330 fold and has the highest delivery cost [35]. To minimize the costs of delivery, necessary steps  
331 are needed to promote deliveries in public and NGOs facilities.

332

333 In rural area of Bangladesh, association of postpartum depression with unintended  
334 pregnancy was found in bivariate analysis, but the association disappeared in multivariate  
335 regression analysis [1, 2, 13]. However, in the urban slum context, the unintended pregnancy  
336 was an independent risk factor for PPD. The association of PPD with unintended pregnancy  
337 persisted even after controlling other risk factors in the multivariate model. An unmet need of  
338 contraceptives was found in both urban and rural areas [36]. A patient centred approach and  
339 providing comprehensive information and access to contraceptive options may helpful for  
340 controlling the unintended pregnancy [37].

341

342           Among the obstetric factors assessed in our study, a history of perinatal and postnatal  
343 child death was associated with postpartum depression; a finding that was consistent with  
344 those of other studies [1, 38, 39]. The fear of a repeat occurrence of a miscarriage, stillbirth, or  
345 child death are thought to be a contributory factors of depression in the antenatal, postnatal  
346 period, or in both periods. The recommended number of antenatal care (ANC) and postnatal  
347 care (PNC) visits may reduce the perinatal and postnatal child death; and consequently reduce  
348 PPD rates in subsequent pregnancies. Healthcare providers should consider the history of  
349 earlier loss as a factor of increased vulnerability of depression during the next pregnancy and  
350 early postpartum period [40].

351

352           Depressive symptom during pregnancy was mostly associated with postpartum  
353 depression, similar to the findings of other studies [1, 5, 41]. Perceived family, working, and  
354 any other mental stress during pregnancy was also associated with PPD like other findings  
355 [42, 43]. Perceived antenatal stress may contribute to development of depressive symptoms in  
356 the antenatal period [44]. These findings highlighted PPD is not only a matter of postpartum  
357 period and noted the importance of intervention in the prenatal period to prevent PPD [41,  
358 42].

359

360           Intimate partner violence (IPV) is the one of the most important risk factors found in  
361 our study, which was consistent with most of the literature of postpartum depression [2, 13,  
362 45-50]. In a recent study of Bangladesh, Ziaie found that all forms of domestic violence were  
363 strongly associated with higher levels of emotional distress during the pregnancy period as  
364 well [51]. In our study, we also found that poor marital relationship (sharing personal feelings  
365 and practical support in household work) with husbands was a strong predictor of PPD,

366 consistent with the findings of other studies [1, 52]. IPV and poor marital relationship might  
367 be associated with each other [53]. Therefore, these findings suggested that couples focused  
368 intervention from the prenatal period may reduce the risk of PPD.

369

## 370 **Strengths and limitations**

371 The main strength of the study was the study focused the rapid increasing segment of  
372 urban population of Bangladesh with a large sample size. To our knowledge it was the first  
373 study to assess the prevalence and risk factors of postpartum depression in urban slum of  
374 Bangladesh. In addition, the study included the wide range of risk factors found in the  
375 postpartum literatures of Bangladesh and similar context. Most importantly, the study used the  
376 repeatedly validated Bangla version of instruments and scale which was nationally and  
377 internationally recognized and widely used.

378 The study had some limitations worth to acknowledge. The design of the study was  
379 cross-sectional and therefore could not measure the incidence of PPD. Data about most of the  
380 risk factors were collected from mother's recall, which may lead to under or over reporting of  
381 symptoms. However, data collectors were intensively trained on the interview techniques to  
382 reduce the recall bias. Some working mothers may not be reached due to strict data collection  
383 timeline and not having schedule of household revisit. We tried to overcome this constraint by  
384 extending the data collection time beyond the office hour and collecting data in weekend as  
385 well.

386

## 387 **Conclusions**

388           The higher prevalence of PPD suggested the importance of mental health support  
389 system for the low income women in slum area. Maternal mental health services should be  
390 integrated with existing maternal health services. The primary maternal health care staffs  
391 could be provided the basic PPD screening and its primary management training, so that they  
392 can refer the PPD cases for appropriate mental health services when needed. They are also  
393 needed to educate about the contextually relevant risk factors of PPD as part of the training  
394 component. Additionally, the existing maternal health services in slum area should be  
395 strengthened and pro-poor friendly.

396           Moreover, research is required to develop the low cost non-pharmacological  
397 management of PPD cases in the informal settlement of urban poor. In addition to that,  
398 research for developing the culturally appropriate preventive interventions to control the risk  
399 factors should be undertaken in the urban slum of Bangladesh.

400

## 401 **Acknowledgements**

402           The study was supported by the James P. Grant School of Public Health (JPGSPH).  
403 This paper is based on the data collected for Summative Learning Project (SLP) for author's  
404 partial requirement of Master of Public Health (MPH) degree of JPGSPH at BRAC  
405 University. The author is grateful to Mahfuz Al Mamun, gender expert and Farzana Rume, a  
406 research psychologist of icddr,b for their training support. He is also thankful to Aniq Hassan  
407 for her final language editing of author's manuscript. Finally he wants to thank icddr,b for  
408 providing the scholarship opportunity for pursuing the MPH degree in JPGSPH.

409

410

## 411 **References**

- 412 1. Gausia K, Fisher C, Ali M, Oosthuizen J. Magnitude and contributory factors of postnatal  
413 depression: a community-based cohort study from a rural sub district of Bangladesh.  
414 *Psychological medicine*. 2009;39(6):999-1007.
- 415 2. Nasreen HE, Edhborg M, Petzold M, Forsell Y, Kabir ZN. Incidence and risk factor of  
416 postpartum depressive symptoms in women: a population based prospective cohort study in a  
417 rural district in Bangladesh. *J Depress Anxiety*. 2015;4(1000180):2167-1044.1000180.
- 418 3. Halbreich U, Karkun S. Cross-cultural and social diversity of prevalence of postpartum  
419 depression and depressive symptoms. *Journal of affective disorders*. 2006;91(2):97-111.
- 420 4. Tronick E, Reck C. Infants of depressed mothers. *Harvard review of psychiatry*.  
421 2009;17(2):147-56.
- 422 5. Gavin NI, Gaynes BN, Lohr KN, Meltzer-Brody S, Gartlehner G, Swinson T. Perinatal  
423 depression: a systematic review of prevalence and incidence. *Obstetrics & Gynecology*.  
424 2005;106(5, Part 1):1071-83.
- 425 6. Fisher J, Mello MCd, Patel V, Rahman A, Tran T, Holton S, et al. Prevalence and  
426 determinants of common perinatal mental disorders in women in low-and lower-middle-  
427 income countries: a systematic review. *Bulletin of the World Health Organization*.  
428 2012;90(2):139-49.
- 429 7. Klainin P, Arthur DG. Postpartum depression in Asian cultures: a literature review.  
430 *International journal of nursing studies*. 2009;46(10):1355-73.
- 431 8. Hegde S, Latha K, Bhat SM, Sharma P, Kamath A, Shetty A. Postpartum depression:  
432 prevalence and associated factors among women in India. *J Womens Health Issues Care*.  
433 2012;1(1):1-7.

- 434 9. Islam MJ, Baird K, Mazerolle P, Broidy L. Exploring the influence of psychosocial factors  
435 on exclusive breastfeeding in Bangladesh. *Archives of women's mental health*.  
436 2017;20(1):173-88.
- 437 10. Dennis CL, Chung-Lee L. Postpartum depression help-seeking barriers and maternal  
438 treatment preferences: A qualitative systematic review. *Birth*. 2006;33(4):323-31.
- 439 11. Vigod SN, Villegas L, Dennis CL, Ross LE. Prevalence and risk factors for postpartum  
440 depression among women with preterm and low-birth-weight infants: a systematic review.  
441 *BJOG: An International Journal of Obstetrics & Gynaecology*. 2010;117(5):540-50.
- 442 12. Milgrom J, Gemmill AW, Bilszta JL, Hayes B, Barnett B, Brooks J, et al. Antenatal risk  
443 factors for postnatal depression: a large prospective study. *Journal of affective disorders*.  
444 2008;108(1):147-57.
- 445 13. Islam MJ, Broidy L, Baird K, Mazerolle P. Intimate partner violence around the time of  
446 pregnancy and postpartum depression: The experience of women of Bangladesh. *PloS one*.  
447 2017;12(5):e0176211.
- 448 14. Surkan PJ, Sakyi KS, Christian P, Mehra S, Labrique A, Ali H, et al. Risk of Depressive  
449 Symptoms Associated with Morbidity in Postpartum Women in Rural Bangladesh. *Maternal  
450 and child health journal*. 2017;21(10):1890-900.
- 451 15. Rahman A, Harrington R, Bunn J. Can maternal depression increase infant risk of illness  
452 and growth impairment in developing countries? *Child: care, health and development*.  
453 2002;28(1):51-6.
- 454 16. Anoop S, Saravanan B, Joseph A, Cherian A, Jacob K. Maternal depression and low  
455 maternal intelligence as risk factors for malnutrition in children: a community based case-  
456 control study from South India. *Archives of Disease in Childhood*. 2004;89(4):325-9.

- 457 17. Hammen C. Social stress and women's risk for recurrent depression. *Archives of Women's*  
458 *Mental Health*. 2003;6(1):9-13.
- 459 18. Murray L, Cooper PJ. Postpartum depression and child development. *Psychological*  
460 *medicine*. 1997;27(2):253-60.
- 461 19. O'hara MW, Swain AM. Rates and risk of postpartum depression—a meta-analysis.  
462 *International review of psychiatry*. 1996;8(1):37-54.
- 463 20. Williams A, Sarker M, Ferdous ST. Cultural Attitudes toward Postpartum Depression in  
464 Dhaka, Bangladesh. *Medical anthropology*. 2018;37(3):194-205.
- 465 21. Khalequzzaman M, Chiang C, Hoque BA, Choudhury SR, Nizam S, Yatsuya H, et al.  
466 Population profile and residential environment of an urban poor community in Dhaka,  
467 Bangladesh. *Environmental health and preventive medicine*. 2017;22(1):1.
- 468 22. Perry HB. Health for all in Bangladesh: lessons in primary health care for the twenty-first  
469 century: University Press; 2000.
- 470 23. National Institute of Population Research and Training (NIPORT), International Centre  
471 for Diarrhoeal Disease Research, Bangladesh (icddr,b) and MEASURE Evaluation.  
472 Bangladesh Urban Health Survey 2013 Final Report. Dhaka, Bangladesh and Chapel Hill,  
473 North Carolina, USA: NIPORT, icddr,b, and MEASURE Evaluation; 2015.
- 474 24. Cox JL, Holden JM, Sagovsky R. Detection of postnatal depression: development of the  
475 10-item Edinburgh Postnatal Depression Scale. *The British journal of psychiatry*.  
476 1987;150(6):782-6.
- 477 25. Gausia K, Fisher C, Algin S, Oosthuizen J. Validation of the Bangla version of the  
478 Edinburgh Postnatal Depression Scale for a Bangladeshi sample. *Journal of Reproductive and*  
479 *Infant Psychology*. 2007;25(4):308-15.



- 480 26. García-Moreno C, Jansen HAFM, Ellsberg M, Heise L, Watts C. WHO multi-country  
481 study on women's health and domestic violence against women. World Health Organization  
482 (WHO), 2005.
- 483 27. Khan AM, Flora MS. Maternal common mental disorders and associated factors: a cross-  
484 sectional study in an urban slum area of Dhaka, Bangladesh. *International journal of mental*  
485 *health systems*. 2017;11(1):23.
- 486 28. des Rivières-Pigeon C, Séguin L, Goulet L, Descarries F. Unravelling the complexities of  
487 the relationship between employment status and postpartum depressive symptomatology.  
488 *Women & Health*. 2001;34(2):61-79.
- 489 29. Hewitt B, Strazdins L, Martin B. The benefits of paid maternity leave for mothers' post-  
490 partum health and wellbeing: Evidence from an Australian evaluation. *Social Science &*  
491 *Medicine*. 2017;182:97-105.
- 492 30. Ministry of Law. Bangladesh Labour Law, 2006. Legislative and Parliamentary Affairs  
493 Division, Justice and Parliamentary Affairs, Ministry of Law, Bangladesh; 2006.
- 494 31. Haggag AK, Geser W, Ostermann H, Schusterschitz C. Depressive symptoms in mothers:  
495 The role of employment and role quality. *Journal of Workplace Behavioral Health*.  
496 2011;26(4):313-33.
- 497 32. Islam MM, Ali M, Ferroni P, Underwood P, Alam MF. Prevalence of psychiatric  
498 disorders in an urban community in Bangladesh. *General hospital psychiatry*. 2003;25(5):353-  
499 7.
- 500 33. Reading R, Reynolds S. Debt, social disadvantage and maternal depression. *Social science*  
501 *& medicine*. 2001;53(4):441-53.

- 502 34. Braveman P, Marchi K, Egerter S, Kim S, Metzler M, Stancil T, et al. Poverty, near-  
503 poverty, and hardship around the time of pregnancy. *Maternal and Child Health Journal*.  
504 2010;14(1):20-35.
- 505 35. National Institute of Population Research and Training (NIPORT), International Centre  
506 for Diarrhoeal Disease Research, Bangladesh (icddr,b) and MEASURE Evaluation.  
507 Bangladesh Maternal Mortality and Health Care Survey 2016: Preliminary Report. Dhaka,  
508 Bangladesh and Chapel Hill, North Carolina, USA: NIPORT, icddr,b, and MEASURE  
509 Evaluation; 2017.
- 510 36. National Institute of Population Research and Training (NIPORT), Mitra and Associates,  
511 and ICF International. Bangladesh Demographic and Health Survey 2014. Dhaka,  
512 Bangladesh, and Rockville, Maryland, USA: Mitra and Associates, and ICF International;  
513 2016.
- 514 37. Lesnewski R. Preventing unintended pregnancy: implications for physicians. *American*  
515 *family physician*. 2004;69(12):2779-80.
- 516 38. Adewuya AO, Fatoye FO, Ola BA, Ijaodola OR, Ibigbami S-MO. Sociodemographic and  
517 obstetric risk factors for postpartum depressive symptoms in Nigerian women. *Journal of*  
518 *Psychiatric Practice*®. 2005;11(5):353-8.
- 519 39. Adewuya AO, Ola BA, Aloba OO, Dada AO, Fasoto OO. Prevalence and correlates of  
520 depression in late pregnancy among Nigerian women. *Depression and anxiety*. 2007;24(1):15-  
521 21.
- 522 40. Giannandrea SA, Cerulli C, Anson E, Chaudron LH. Increased risk for postpartum  
523 psychiatric disorders among women with past pregnancy loss. *Journal of Women's Health*.  
524 2013;22(9):760-8.

- 525 41. Buist A. Perinatal depression--assessment and management. *Australian family physician*.  
526 2006;35(9):670.
- 527 42. Britton JR. Maternal anxiety: course and antecedents during the early postpartum period.  
528 *Depression and anxiety*. 2008;25(9):793-800.
- 529 43. Schwab-Reese LM, Schafer EJ, Ashida S. Associations of social support and stress with  
530 postpartum maternal mental health symptoms: Main effects, moderation, and mediation.  
531 *Women & health*. 2017;57(6):723-40.
- 532 44. Li Y, Zeng Y, Zhu W, Cui Y, Li J. Path model of antenatal stress and depressive  
533 symptoms among Chinese primipara in late pregnancy. *BMC pregnancy and childbirth*.  
534 2016;16(1):180.
- 535 45. Beydoun HA, Beydoun MA, Kaufman JS, Lo B, Zonderman AB. Intimate partner  
536 violence against adult women and its association with major depressive disorder, depressive  
537 symptoms and postpartum depression: a systematic review and meta-analysis. *Social science*  
538 *& medicine*. 2012;75(6):959-75.
- 539 46. Wu Q, Chen H-L, Xu X-J. Violence as a risk factor for postpartum depression in mothers:  
540 a meta-analysis. *Archives of women's mental health*. 2012;15(2):107-14.
- 541 47. Howard LM, Oram S, Galley H, Trevillion K, Feder G. Domestic violence and perinatal  
542 mental disorders: a systematic review and meta-analysis. *PLoS medicine*.  
543 2013;10(5):e1001452.
- 544 48. Ludermir AB, Lewis G, Valongueiro SA, de Araújo TVB, Araya R. Violence against  
545 women by their intimate partner during pregnancy and postnatal depression: a prospective  
546 cohort study. *The Lancet*. 2010;376(9744):903-10.

- 547 49. Bacchus L, Mezey G, Bewley S. Domestic violence: prevalence in pregnant women and  
548 associations with physical and psychological health. *European Journal of Obstetrics and*  
549 *Gynecology and Reproductive Biology*. 2004;113(1):6-11.
- 550 50. Kabir ZN, Nasreen H-E, Edhborg M. Intimate partner violence and its association with  
551 maternal depressive symptoms 6–8 months after childbirth in rural Bangladesh. *Global health*  
552 *action*. 2014;7(1):24725.
- 553 51. Ziaei S, Frith AL, Ekström E-C, Naved RT. Experiencing lifetime domestic violence:  
554 associations with mental health and stress among pregnant women in rural Bangladesh: the  
555 MINIMat Randomized Trial. *PLoS one*. 2016;11(12):e0168103.
- 556 52. Beck CT. Predictors of postpartum depression: an update. *Nursing research*.  
557 2001;50(5):275-85.
- 558 53. Capaldi DM, Knoble NB, Shortt JW, Kim HK. A systematic review of risk factors for  
559 intimate partner violence. *Partner abuse*. 2012;3(2):231-80.

560

## 561 **Supporting information**

562 **S1 File. Data file.**

563 (DTA)

564
